# Supplementary material for: Expression of Phosphorylated BRD4 Is Markedly Associated with the Activation Status of the PP2A Pathway and Shows a Strong Prognostic Value in Triple Negative Breast Cancer Patients
Source: PubMed Central journal article supplement (PMC7999847; doi:10.3390/cancers13061246), 2021-03-12
Supplement: cancers-13-01246-s001.pdf [file cancers-13-01246-s001.pdf]

## Supplementary Materials:

# Expression of Phosphorylated BRD4 is Markedly Associated with the Activation Status of the PP2A Pathway and Shows a Strong Prognostic Value in Triple Negative Breast Cancer Patients

Marta Sanz-Alvarez, Ion Cristóbal, Melani Luque, Andrea Santos, Sandra Zazo, Juan Madoz-Gúrpide, Cristina Caramés, Cheng-Ming Chiang, Jesús García-Foncillas, Pilar Eroles, Joan Albanell and Federico Rojo

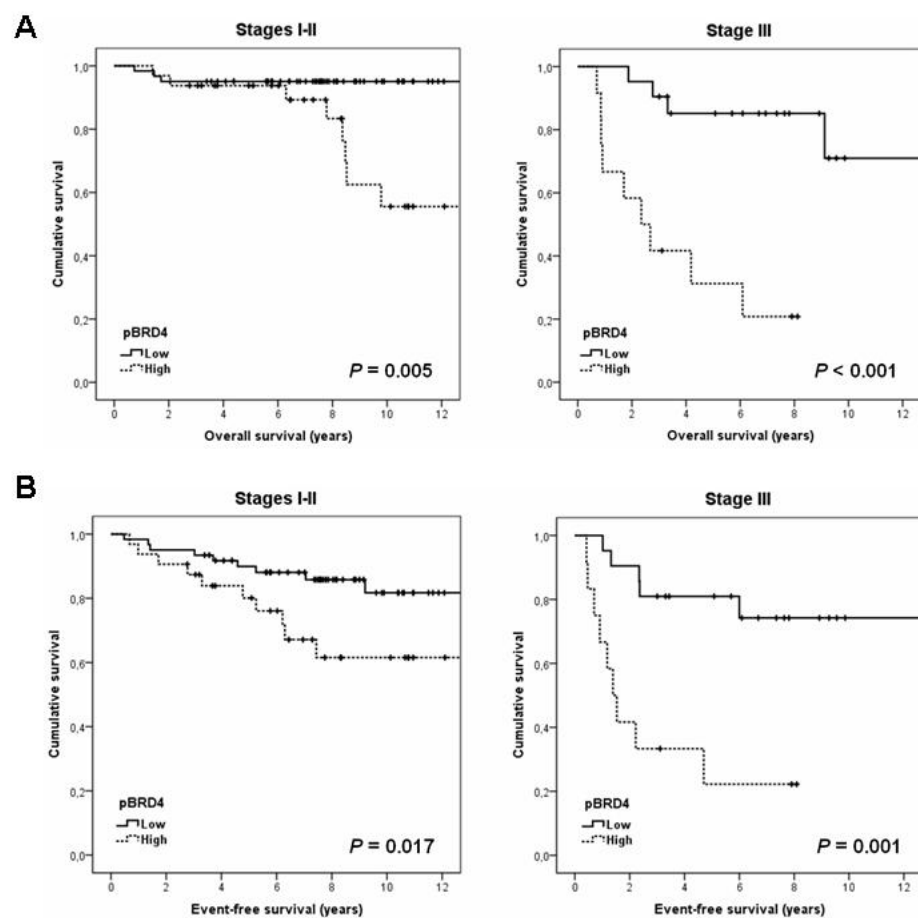

**Figure S1.** Clinical impact of pBRD4 in the cohort of 132 TNBC patients stratified by stage in (A) OS and (B) EFS.

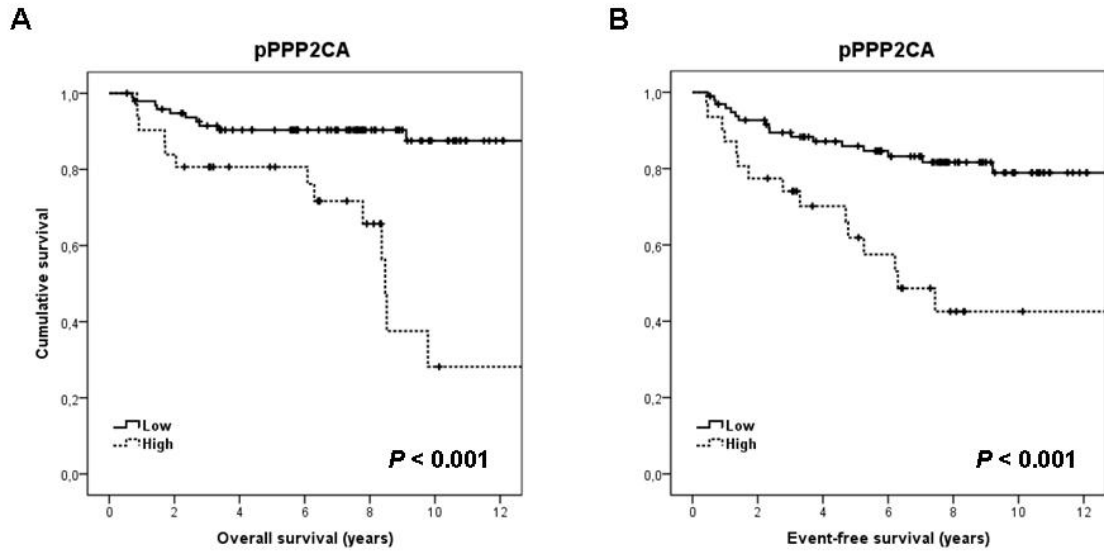

**Figure S2.** Clinical impact of pPPP2CA in the cohort of 132 TNBC patients in (A) OS and (B) EFS.

**Table S1.** Clinical and molecular characteristics in a series of 132 triple negative breast cancer patients.

| Variation             | Variation                | No. (%)    |
|-----------------------|--------------------------|------------|
| Age                   |                          |            |
| Median (range)        | 57.5 (31–90)             |            |
| T                     |                          |            |
|                       | 1                        | 54 (40.9)  |
|                       | 2                        | 60 (45.5)  |
|                       | 3–4                      | 18 (13.6)  |
| N                     |                          |            |
|                       | 0                        | 77 (58.3)  |
|                       | 1                        | 33 (25.0)  |
|                       | 2–3                      | 22 (16.7)  |
| Stage                 |                          |            |
|                       | I                        | 39 (29.5)  |
|                       | II                       | 60 (45.5)  |
|                       | III                      | 33 (25.0)  |
| Grade                 |                          |            |
|                       | Low                      | 4 (3.0)    |
|                       | Moderate                 | 43 (32.6)  |
|                       | High                     | 85 (64.4)  |
| Morphological type    |                          |            |
|                       | IDC                      | 122 (92.4) |
|                       | ILC                      | 9 (6.8)    |
|                       | Others                   | 1 (0.8)    |
| Hormonal status       |                          |            |
|                       | Premenopausal            | 36 (27.3)  |
|                       | Postmenopausal           | 96 (73.7)  |
| Chemotherapy          |                          |            |
|                       | None                     | 8 (6.1)    |
|                       | Adjuvant                 | 104 (78.8) |
|                       | Neoadjuvant              | 20 (15.1)  |
| Chemotherapy backbone |                          |            |
|                       | None                     | 8 (6.1)    |
|                       | Anthracyclines           | 49 (37.1)  |
|                       | Anthracyclines + Taxanes | 42 (31.8)  |
|                       | CMF                      | 33 (25.0)  |

|         |     |    |        |
|---------|-----|----|--------|
| Relapse | No  | 98 | (74.2) |
|         | Yes | 34 | (25.8) |

IDC: invasive ductal carcinoma; ILC: invasive lobular carcinoma.

**Table S2.** Association between SET and pPPP2CA expression levels in TNBC.

|         | No. Cases | No. Low SET (%) | No. High SET (%) | <i>p</i>         |
|---------|-----------|-----------------|------------------|------------------|
| pPPP2CA | 128       | 111             | 17               | <b>&lt;0.001</b> |
| Low     | 97        | 92 (82.9)       | 5 (29.4)         |                  |
| High    | 31        | 19 (17.1)       | 12 (70.6)        |                  |
